# Supplementary material for: Thermoelectric Zintl phases with ultralow thermal conductivity: synthesis, structural characterization, and transport properties of Ca10AlSb9 and Ca10CdSb9
Source: Royal Society of Chemistry journal article supplement (doi:10.1039/d4ta05000b), 2024-01-01
Supplement: d4ta05000b1.pdf [file d4ta05000b1.pdf]

# Thermoelectric Zintl phases with ultralow thermal conductivity. Synthesis, structural characterization, and transport properties of $\text{Ca}_{10}\text{AlSb}_9$ and $\text{Ca}_{10}\text{CdSb}_9$

Kowsik Ghosh<sup>1</sup>, Leah Borgsmiller<sup>2</sup>, Sviatoslav Baranets<sup>1,3</sup>, G. Jeffrey Snyder<sup>2\*</sup> and Svilen Bobev<sup>1\*</sup>

<sup>1</sup> Department of Chemistry and Biochemistry, University of Delaware, Newark, Delaware  
19716, United States

<sup>2</sup> Department of Materials Science and Engineering, Northwestern University, Evanston, IL  
60208, United States

<sup>3</sup> Department of Chemistry, Louisiana State University, Baton Rouge, Louisiana 70803, United  
States

\* Corresponding authors. Email: [bobev@udel.edu](mailto:bobev@udel.edu); [jeff.snyder@northwestern.edu](mailto:jeff.snyder@northwestern.edu)

## CONTENTS

Figure S1. Powder X-ray diffraction patterns for as-synthesized powder samples of  $\text{Ca}_{10}\text{CdSb}_9$  and  $\text{Ca}_{10}\text{AlSb}_9$ .

Figure S2. Representation of the  $[\text{AlSb}_4]$  and  $[\text{Ca}_4\text{Sb}_6]$  polyhedra in  $\text{Ca}_{10}\text{AlSb}_9$ , showing their “overlapping”.

Figure S3. Total and projected electronic density of state (DOS) for  $\text{Ca}_{11}\text{CdSb}_9$  model.

Figure S4. Schematic representation for the structural disorder in  $\text{Ca}_{11}\text{CdSb}_9$  (model III). Respective occupancies are annotated.

Figure S5. Thermoelectric quality factor for  $\text{Ca}_{11}\text{CdSb}_9$ .

Table S1. Selected distances in  $\text{Ca}_{10}\text{AlSb}_9$ .

Table S2. Selected distances in  $\text{Ca}_{10}\text{CdSb}_9$ .

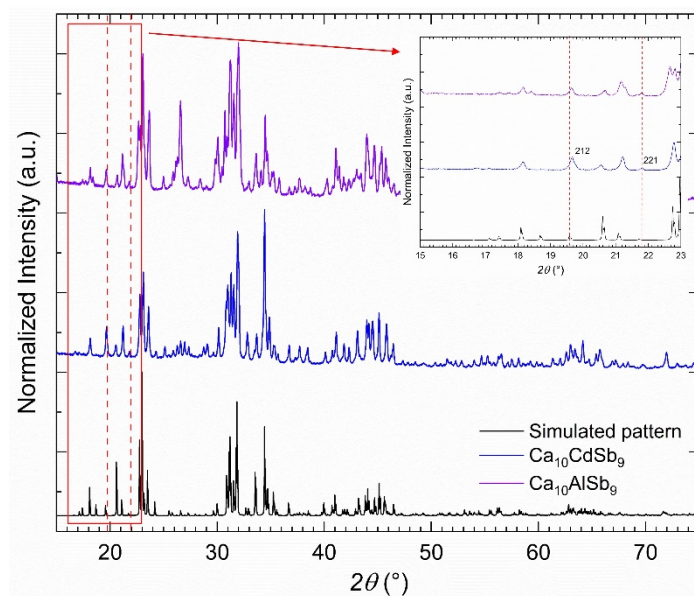

Figure S1. Powder X-ray diffraction patterns for as-synthesized powder samples of  $\text{Ca}_{10}\text{CdSb}_9$  and  $\text{Ca}_{10}\text{AlSb}_9$ . The inset shows the magnified range of  $2\theta$  from  $15^\circ$  to  $23^\circ$ , where the vertical red dashed line shows the Bragg reflections (212) and (221) at  $2\theta$  of  $19.9^\circ$  and  $22^\circ$ .

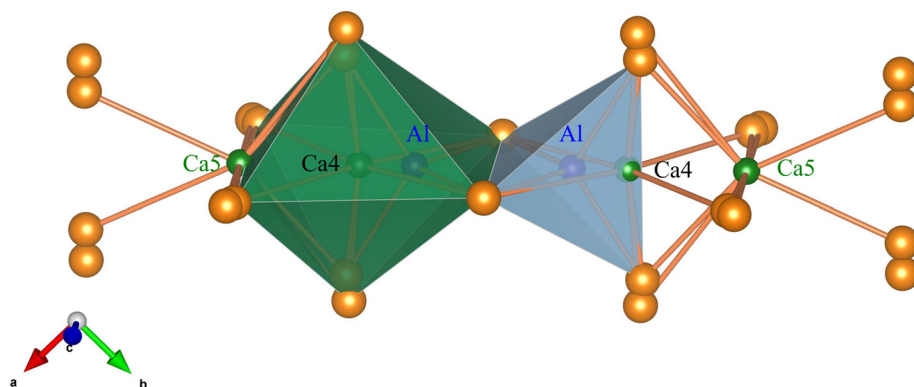

Figure S2. Representation of the  $[\text{AlSb}_4]$  and  $[\text{Ca}_4\text{Sb}_6]$  polyhedra in  $\text{Ca}_{10}\text{AlSb}_9$ , showing their “overlapping”. One can see the Al atom lie inside the  $[\text{Ca}_4\text{Sb}_6]$  octahedra indicating that these two polyhedra cannot exist simultaneously.

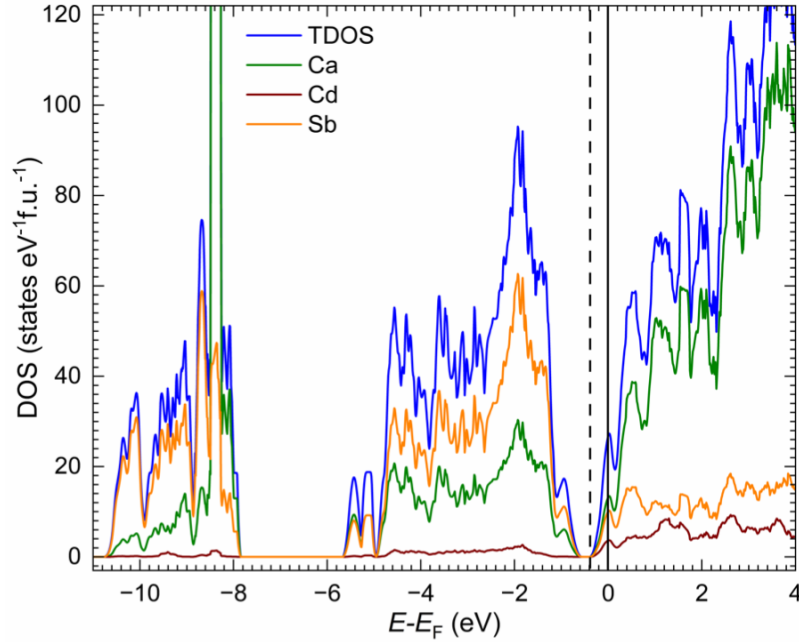

Figure S3. Total and projected electronic density of state (DOS) for  $\text{Ca}_{11}\text{CdSb}_9$  model. The vertical solid line indicates the Fermi level while the vertical dashed line close to the solid line represents the actual Fermi level position after removing one electron per formula unit.

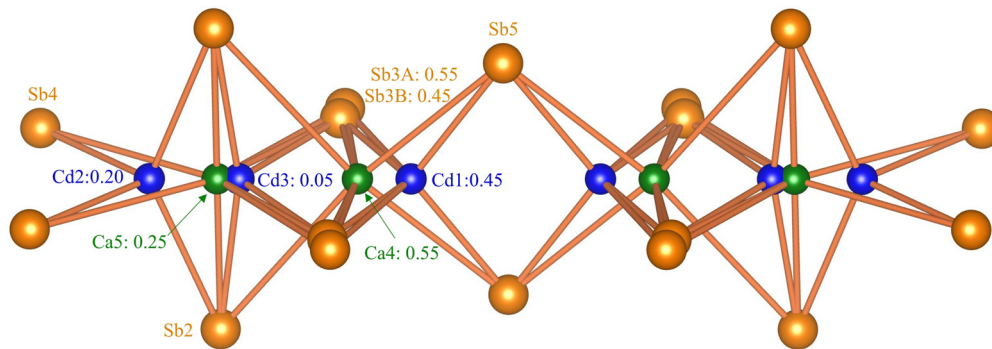

Figure S4. Schematic representation for the structural disorder in  $\text{Ca}_{11}\text{CdSb}_9$  (model III). Respective occupancies are annotated.

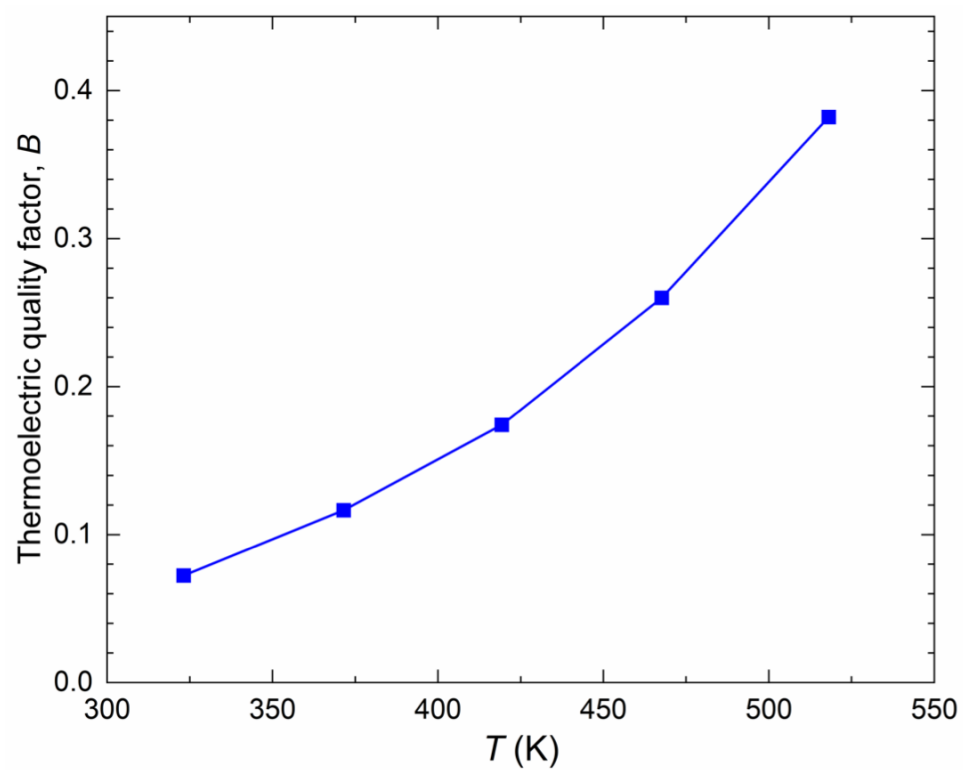

Figure S5. Thermoelectric quality factor for  $\text{Ca}_{11}\text{CdSb}_9$ .

Table S1. Selected distances in Ca<sub>10</sub>AlSb<sub>9</sub>.

|      | <b>Atoms</b> | <b>Distances (Å)</b> |          | <b>Atoms</b> | <b>Distances (Å)</b>  |                       |
|------|--------------|----------------------|----------|--------------|-----------------------|-----------------------|
| Ca1  | Sb6          | 3.140(1)             | Ca5      | Sb2A ×2      | 2.864(1)              |                       |
|      | Sb5          | 3.175(1)             |          | Sb2B ×2      | 3.079(1)              |                       |
|      | Sb2B         | 3.294(1)             |          | Sb3B ×2      | 3.201(1)              |                       |
|      | Sb3B         | 3.379(1)             |          | Sb4B ×2      | 3.51(1)               |                       |
|      | Sb1          | 3.385(1)             |          | Sb3A ×2      | 3.661(1)              |                       |
|      | Sb1          | 3.438(1)             |          | Sb4A ×2      | 3.834(6)              |                       |
|      | Sb3A         | 3.458(1)             |          |              |                       |                       |
|      | Sb2A         | 3.528(1)             |          | Ca6A         | Sb4B ×2               | 2.816(5)              |
|      | Sb2A         | 3.589(1)             |          |              | Sb2B ×2               | 3.151(4)              |
|      |              | Sb4A ×2              | 3.207(3) |              |                       |                       |
| Ca2  | Sb1          | 3.139(1)             |          | Sb2A ×2      | 3.359(2)              |                       |
|      | Sb3A         | 3.139(1)             |          | Sb1 ×2       | 3.770(1)              |                       |
|      | Sb6          | 3.179(1)             | Ca6B     | Sb2B ×2      | 3.093(4)              |                       |
|      | Sb2A         | 3.184(2)             |          | Sb4B ×2      | 3.13(1)               |                       |
|      | Sb3A         | 3.214(1)             |          | Sb2A ×2      | 3.328(2)              |                       |
|      | Sb3B         | 3.220(2)             |          | Sb4A ×2      | 3.49(1)               |                       |
|      | Sb2B         | 3.228(1)             |          | Sb5          | 3.63(4)               |                       |
|      | Sb4A         | 3.359(1)             |          | Sb1 ×2       | 3.717(1)              |                       |
| Ca3A | Sb3A         | 3.007(2)             | Al1      | Sb5 ×2       | 2.721(4)              |                       |
|      | Sb3A         | 3.008(2)             |          | Sb3B ×2      | 2.761(7)              |                       |
|      | Sb3B         | 3.130(3)             |          | Sb3A ×2      | 3.221(7)              |                       |
|      | Sb3B         | 3.130(3)             | Sb1      | Sb2B         | 2.892(6)              |                       |
|      | Sb4A         | 3.278(2)             |          | Sb2A         | 2.947(3)              |                       |
| Ca3B | Sb3A         | 3.06(5)              | Ca3A     | Ca3B ×2      | 0.67(5) <sup>a</sup>  |                       |
|      | Sb3A         | 3.06(5)              |          | Ca4          | Al1                   | 1.142(8) <sup>a</sup> |
|      | Sb3B         | 3.06(5)              | Ca5      |              | 2.464(7) <sup>a</sup> |                       |
|      | Sb3B         | 3.06(5)              |          |              |                       |                       |
|      | Sb5          | 3.20(3)              |          |              |                       |                       |
| Ca4  | Sb3B ×2      | 2.375(4)             |          |              |                       |                       |
|      | Sb3A ×2      | 2.919(4)             |          |              |                       |                       |
|      | Sb5 ×2       | 3.523(3)             |          |              |                       |                       |
|      | Ca3B ×2      | 3.62(5)              |          |              |                       |                       |
|      | Sb2A ×2      | 3.687(3)             |          |              |                       |                       |

<sup>a</sup> Unphysical distances between partial occupied sites.

Table S2: Selected distances in Ca<sub>10</sub>CdSb<sub>9</sub>.

|     | <b>Atoms</b> | <b>Distances (Å)</b> |      | <b>Atoms</b> | <b>Distances (Å)</b>  |
|-----|--------------|----------------------|------|--------------|-----------------------|
| Ca1 | -Sb6         | 3.1399(9)            | Ca5  | -Sb2 ×2      | 2.974(1)              |
|     | -Sb5         | 3.153(1)             |      | -Sb3B ×2     | 3.182(6)              |
|     | -Sb3B        | 3.397(1)             |      | -Sb3A ×2     | 3.556(5)              |
|     | -Sb1         | 3.401(0)             |      | -Sb4 ×2      | 3.977(5)              |
|     | -Sb3A        | 3.461(2)             | Ca6  | -Sb2 ×2      | 3.2740(4)             |
|     | -Sb1         | 3.463(1)             |      | -Cd2 ×2      | 3.351(2)              |
|     | -Sb2         | 3.466(1)             |      | -Sb4 ×2      | 3.381(2)              |
| Ca2 | -Sb3A        | 3.135(2)             | Cd1  | -Sb5 ×2      | 2.846(1)              |
|     | -Sb1         | 3.139(1)             |      | -Sb3B ×2     | 2.862(3)              |
|     | -Sb6         | 3.179(1)             |      | -Sb3A ×2     | 3.207(2)              |
|     | -Sb3B        | 3.184(2)             | Cd2  | -Sb4 ×2      | 2.924(2)              |
|     | -Sb2         | 3.207(1)             |      | -Sb2 ×2      | 3.214(1)              |
|     | -Sb3A        | 3.211(2)             |      | Sb1          | -Sb2                  |
|     | -Sb4         | 3.386(1)             | Sb3A |              | -Sb3B                 |
|     | -Sb3B        | 3.491(3)             | Ca4  | -Cd1         | 0.961(4) <sup>a</sup> |
| Ca3 | -Sb3A        | 3.011(3)             |      | -Ca5         | 2.384(6) <sup>a</sup> |
|     | -Sb3B        | 3.122(4)             | Ca5  | -Cd2         | 1.334(5) <sup>a</sup> |
|     | -Sb4         | 3.301(1)             |      |              |                       |
| Ca4 | -Sb3B ×2     | 2.541(5)             |      |              |                       |
|     | -Sb3A ×2     | 2.946(4)             |      |              |                       |
|     | -Sb5 ×2      | 3.504(3)             |      |              |                       |

<sup>a</sup> Unphysical distances between partial occupied sites.
